# Supplementary material for: Solvent-Free and Efficient One-Pot Strategy for Synthesis of the Triazine-Heterocycle Azacyanines
Source: MDPI journal article supplement (doi:10.3390/ma15072619), 2022-04-02
Supplement: s1 [file s1]

## Supplementary Information

# Solvent-free and efficient one-pot strategy for synthesis of the triazine-heterocycle azacyanines

Xianwu Jiang <sup>1</sup>, Zhuodong Sun <sup>2</sup> and Yu Wang <sup>1,\*</sup>

<sup>1</sup>School of Chemical Engineering, East China University of Science and Technology, Shanghai, 200237, China.

<sup>2</sup>M.S, School of Chemistry and Molecular Engineering, East China Normal University, Shanghai 200241, China.

<sup>1\*</sup>School of Chemical Engineering, East China University of Science and Technology, Shanghai, 200237, China.

### 1. The mechanism of the reaction to prepare of azacyanines

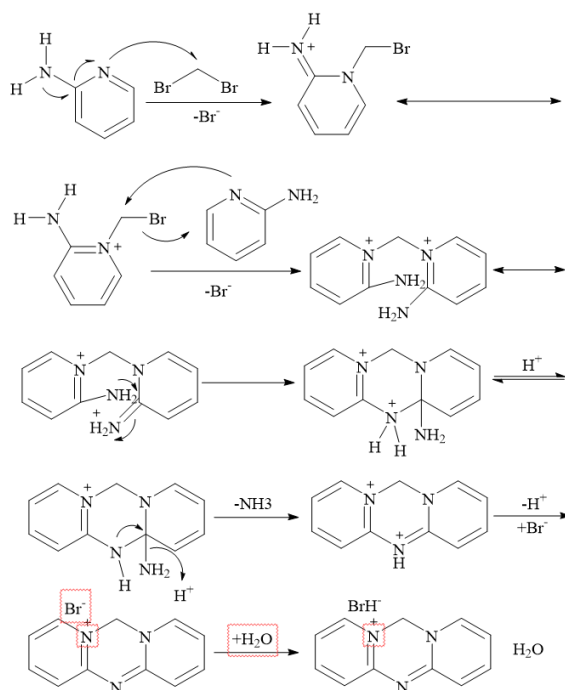

**Figure S1.** The mechanism of the reaction between 2-aminopyridine and dibromomethane.

The mechanism of the reaction is that the bromo group on dibromomethane was nucleophilic attack on the amino group of pyridine, namely one molar ratio of dibromomethane was reacted with 2 molar ratio aminopyridine through intramolecular cyclization reaction to sequentially synthesis of final structure, triazine-heterocycle azacyanines.

## 2. Single crystal diffraction results of Azacyanine 1.

**Table S1.** Crystal data and structure refinement for Azacyanine 1

| Program                         | Value                                                                          |
|---------------------------------|--------------------------------------------------------------------------------|
| Empirical formula               | C <sub>44</sub> H <sub>40</sub> Br <sub>4</sub> N <sub>12</sub> O <sub>4</sub> |
| Formula weight                  | 1120.48 g/mol                                                                  |
| Temperature                     | 295±2 K                                                                        |
| Wavelength                      | 0.071073 nm                                                                    |
| Crystal system                  | monoclinic system                                                              |
| Space group                     | P21                                                                            |
| Unit cell dimensions            | a=5.495±2 Å α=90°                                                              |
|                                 | b=11.939±4 Å β=95.370±6°                                                       |
|                                 | c=17.717±6 Å γ=90°                                                             |
| Volume                          | 1157.2±7 Å <sup>3</sup>                                                        |
| Z                               | 1                                                                              |
| Calculated density              | 1.608 mg/m <sup>3</sup>                                                        |
| Absorption coefficient          | 3.534 mm <sup>-1</sup>                                                         |
| F(000)                          | 560                                                                            |
| Limiting indices                | -7≤h≤4, -15≤k≤15, -22≤l≤22                                                     |
| Theta range for data collection | 2.06°≤θ≤27.50°                                                                 |
| Completeness to theta           | 97.3%                                                                          |
| Goodness-of-fit                 | 2.756                                                                          |
| Final R indices                 | R <sub>1</sub> =0.1862                                                         |
| [I>2sigma(I)]                   | wR <sub>2</sub> =0.5380                                                        |
| R indices                       | R=0.2011                                                                       |
| (all data)                      | wR <sub>2</sub> =0.5512                                                        |
| Largest diff. peak and hole     | 4.363 Å <sup>-3</sup> 、-1.818e Å <sup>-3</sup>                                 |

The description of the crystal data information such as chemical formula, molecular weight, crystal system and space group, temperature, unit cell parameters, model of the diffractometer, type of the absorption correction, number of independent and

observed reflections, number of refined parameters show in Table S1.

### 3. The unit cell of Azacyanine 1

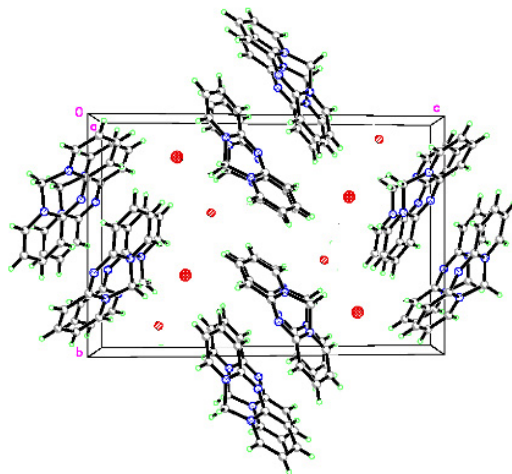

**Figure S2.** Crystal packing diagram of Azacyanine 1

Figure S2 presents the unit cell of Azacyanine 1. It is the crystal cell accumulation diagram of the molecule along the c axis.
